# Supplementary material for: Influence on the temperature estimation of the planetary boundary layer scheme with different minimum eddy diffusivity in WRF v3.9.1.1
Source: Copernicus journal article supplement (doi:10.5194/gmd-14-6135-2021), 2021-10-12
Supplement: Supplementary file [file gmd-14-6135-2021-supplement-title-page.pdf › gmd-14-6135-2021-supplement-title-page.pdf]

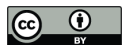

## *Supplement of*

# **Influence on the temperature estimation of the planetary boundary layer scheme with different minimum eddy diffusivity in WRF v3.9.1.1**

**Hongyi Ding et al.**

*Correspondence to:* Le Cao ([le.cao@nuist.edu.cn](mailto:le.cao@nuist.edu.cn))

- [gmd-14-6135-2021-supplement-title-page.pdf](#)
- supplements
  - Modified\_WRF\_Code
    - \* module\_bl\_acm.F
    - \* module\_first\_rk\_step\_part1.F
    - \* module\_pbl\_driver.F
  - WRF\_namelist
    - \* namelist.input
    - \* namelist.wps
  - obs\_data
    - \* 24h\_rh0108-10.txt
    - \* 24h\_rh0109-10.txt
    - \* 24h\_rh0110-10.txt
    - \* 24h\_rh0111-10.txt
    - \* 24h\_rh0112-10.txt
    - \* 24h\_rh0113-10.txt
    - \* 24h\_rh0114-10.txt
    - \* 24h\_rh0115-10.txt
    - \* 24h\_rh0119-10.txt
    - \* 24h\_rh0120-10.txt
    - \* 24h\_rh0121-10.txt
    - \* 24h\_rh0122-10.txt
    - \* 24h\_rh0123-10.txt
    - \* 24h\_rh0124-10.txt
    - \* 24h\_temp0108-10.txt
    - \* 24h\_temp0109-10.txt

- \* 24h\_temp0110-10.txt
- \* 24h\_temp0111-10.txt
- \* 24h\_temp0112-10.txt
- \* 24h\_temp0113-10.txt
- \* 24h\_temp0114-10.txt
- \* 24h\_temp0115-10.txt
- \* 24h\_temp0119-10.txt
- \* 24h\_temp0120-10.txt
- \* 24h\_temp0121-10.txt
- \* 24h\_temp0122-10.txt
- \* 24h\_temp0123-10.txt
- \* 24h\_temp0124-10.txt
- \* p\_tower.spa
- \* pollutiondata
- \* realdata1.xlsx
- post-processing-scripts
  - \* OBS\_line.py
  - \* TowerPressure.py
  - \* read\_vars.ncl
  - \* spatial\_2D.py
  - \* study\_area\_terrian\_landuse.py
- supplement.pdf

The copyright of individual parts of the supplement might differ from the article licence.
